# Supplementary material
Source: MDPI journal article supplement (https://www.mdpi.com/2311-5637/6/2/60)
Supplement: s1 [file s1]

# Supplementary Materials: Sequential non-*Saccharomyces* and *Saccharomyces cerevisiae* Fermentations to Reduce the Alcohol Content in Wine

Margarita García <sup>1</sup>, Braulio Esteve-Zarzoso <sup>2</sup>, Juan Mariano Cabellos <sup>1</sup> and Teresa Arroyo <sup>1,\*</sup>

**Table S1.** Volatile acidity (as g/L of acetic acid), reducing sugars (glucose + fructose, g/L) and dry weight (mg) of wines after Section I (pure culture of non-*Saccharomyces* strains and the control under aerobic conditions).

| Strains     | Volatile acidity | Reducing sugars | Dry weight |
|-------------|------------------|-----------------|------------|
| CLI 1218    | 0.83             | 154.00          | 0.35       |
| 31-1C       | 0.09             | 166.40          | 0.18       |
| 21A-5C      | 0.33             | 121.20          | 1.60       |
| 23A-6C      | 0.44             | 0.50            | 5.80       |
| 5B-1C       | 0.88             | 1.91            | 7.19       |
| 6-5A        | 0.89             | 155.80          | 1.35       |
| 2A-1B       | 0.42             | 0.60            | 3.87       |
| CLI 194     | 0.79             | 93.20           | 1.80       |
| CLI 190     | 0.95             | 85.60           | 0.98       |
| CLI 417     | 0.35             | 112.20          | 0.95       |
| 7A-3A       | 0.56             | 1.60            | 2.50       |
| 8A-8B       | 0.70             | 0.14            | 3.29       |
| CLI 225     | 0.61             | 133.20          | 0.94       |
| CLI 72      | 0.50             | 156.00          | 1.05       |
| CLI 903     | 0.14             | 187.30          | 0.56       |
| CLI 3       | 0.54             | 130.80          | 0.94       |
| LS1 FF2 3A  | 0.61             | 64.75           | 3.30       |
| LS2 FF2 1A  | 0.66             | 61.15           | 2.59       |
| CLI 918     | 0.53             | 17.60           | 0.22       |
| CLI 68      | 0.12             | 170.00          | 0.72       |
| CLI 457     | 0.10             | 161.40          | 0.66       |
| CLI 463     | 0.11             | 149.20          | 0.42       |
| CLI 219     | 0.10             | 177.20          | 0.79       |
| CLI 460     | 0.10             | 107.80          | 0.60       |
| CLI 461     | 0.11             | 143.20          | 0.74       |
| AMB FF4 10A | 0.22             | 70.95           | 2.99       |
| 3-4A        | 0.57             | 1.55            | 2.56       |
| 9-6C        | 0.15             | 95.20           | 3.71       |
| CLI 1219    | 0.20             | 65.65           | 2.29       |
| CLI 679     | 0.25             | 194.20          | 0.22       |
| CLI 1217    | 0.09             | 157.60          | 0.41       |
| CLI 1221    | 0.13             | 172.40          | 0.38       |
| CLI 622     | 0.56             | 168.20          | 3.80       |
| CLI 889     | 0.40             | 0.66            | 5.64       |

Initial sugar concentration of Malvar must was approximately 230 g/L.
